# Supplementary material
Source: bioRxiv or medRxiv preprint supplement (https://medrxiv.org/highwire/filestream/83521/field_highwire_adjunct_files/0/2020.05.29.20116509-1.pdf)
Supplement: Supplementary file [file 2020.05.29.20116509-1.pdf]

## Supplementary Information

**Table S1.** Between-network connectivity results.

| <b>Pre- versus Post-Intervention Comparison (one-sided contrast)</b>                          | <b>T(22)</b> | <b>p-unc</b> | <b>p-FDR</b> |
|-----------------------------------------------------------------------------------------------|--------------|--------------|--------------|
| Frontoparietal-Lateral Prefrontal Cortex-Left and Sensorimotor-Lateral-Right                  | 4.02         | 0.0003       | 0.0017       |
| Frontoparietal-Lateral Prefrontal Cortex-Left and Dorsal Attention-Intraparietal Sulcus-Right | 3.21         | 0.0020       | 0.0140       |
| Dorsal Attention -Intraparietal Sulcus-Right and Visual-Occipital                             | 2.97         | 0.0035       | 0.0245       |
| Dorsal Attention -Intraparietal Sulcus-Right and Visual-Lateral-Right                         | 2.61         | 0.0080       | 0.0281       |
| Dorsal Attention -Intraparietal Sulcus-Right and Visual-Lateral-Left                          | 2.39         | 0.0130       | 0.0303       |
| <b>AB&gt;BA and TP2&gt;TP1 Interaction (one-sided contrast)</b>                               | <b>T(22)</b> | <b>p-unc</b> | <b>p-FDR</b> |
| Default Mode Network-Medial Prefrontal Cortex and Sensorimotor-Superior                       | -3.20        | 0.0021       | 0.0128       |

**Table S2.** Within-network connectivity results.

| <b>Pre- versus Post-Intervention Comparison (one-sided contrast)</b>                            | <b>T(22)</b> | <b>p-unc</b> | <b>p-FDR</b> |
|-------------------------------------------------------------------------------------------------|--------------|--------------|--------------|
| Frontoparietal-Lateral Prefrontal Cortex-Left to Frontoparietal-Lateral Prefrontal Cortex-Right | -2.58        | 0.0171       | 0.0494       |
| Frontoparietal-Lateral Prefrontal Cortex-Left to Frontoparietal-Posterior Parietal Cortex-Left  | -2.28        | 0.0329       | 0.0494       |
| Saliency-Supramarginal Gyrus-Left to Saliency-Supramarginal Gyrus-Right                         | -3.02        | 0.0063       | 0.0322       |
| Saliency-Supramarginal Gyrus-Left to Saliency-Anterior Insula-Right                             | -2.79        | 0.0107       | 0.0322       |
